# Supplementary material for: Identification and characterization of melon circular RNAs involved in powdery mildew responses through comparative transcriptome analysis
Source: PeerJ. 2021 Apr 15;9:e11216. doi: 10.7717/peerj.11216 (PMC8053381; doi:10.7717/peerj.11216)
Supplement: Supplemental Information 2 [file peerj-09-11216-s002.xls]

## Sheet: Sheet1
Table S1. Primer sequences used for circRNA validation and qRT-PCR.
CircRNA name	Forward primer sequence (5'-3')	Revers primer sequence (5'-3')
Cmcirc0260	AGGCACAACGACGCAATTATCAGGG	ATGTAGATCCAACTTTCTATTCACTC
Cmcirc0881	AACGCTTTGTAATGCAGTGGATATCT	TTCCTACCTCACACAAGTCAGAAAT
Cmcirc1283	TCTCAATTCAATTCCCTTAGTATTTA	TCCGACTTGCATGTGTTAAGCATGC
Cmcirc2417	GTGAGAGAGTGTGAGAGAGTGTG	CAATTTCGTATAAACAACATCATTTAG
Cmcirc3971	GCCATGTGGAACGACGACCGCCG	GCTCGGCTCAAACTCAGAGAACCC
Cmcirc4093	CGGTAAACTCCGAGTATTTTCGTAC	GGTTAAATTAGAATACTAGCCTCTT
CmActin	CGCCACTCAACCCAAAGG	CATCACCAGAATCCAGCACAAT
Random Primer	9N （AGCT）
CircRNA name	Divergent Primer Sequences
Cmcirc0260	AGAGGATGATCAGCCACACTGGGACT
	TCCGACTTGCATGTGTTAAGCATGCCG
Cmcirc0881	AGTGCAAACCGATAGCTGCAGAAGT
	GGTATGCGTCCTTGGATTGCTGTTGC
Cmcirc2417	TAACGTTGTCAATGGTATCGGAGCTC
	GAGTCCACCCTTCACCTTGTTCTCCG
