# Supplementary material for: Identification and characterization of melon circular RNAs involved in powdery mildew responses through comparative transcriptome analysis
Source: PeerJ. 2021 Apr 15;9:e11216. doi: 10.7717/peerj.11216 (PMC8053381; doi:10.7717/peerj.11216)
Supplement: Supplemental Information 4 [file peerj-09-11216-s004.xlsx]

## Sheet: Sheet1
Supplementary Table S3 The Cycle threshold (Ct) values used for qRT-PCR analysis
	Cmcirc0260	Cmcirc0881	Cmcirc1283	Cmcir2417	Cmcir3971	Cmcir4093	Cmactin
mock	28.5983	29.0233	28.9504	28.9372	27.867	30.8442	21.8747
	28.4873	29.153	28.7003	28.9504	27.9937	30.971	21.8475
	28.4275	29.1246	28.7849	29.2231	28.2355	30.9473	21.9701
M24	27.7117	28.1034	28.5683	28.0548	27.8502	28.1708	21.9287
	27.8152	27.8944	28.289	27.8485	28.0477	28.0017	21.7049
	27.7968	28.136	28.334	27.7128	27.6198	28.0628	21.9259
M48	27.376	27.5506	28.0056	27.5448	25.7405	27.6283	21.8042
	26.9974	27.3351	27.3212	27.7412	25.5401	27.2388	21.6116
	27.2601	27.7467	27.5057	27.4483	25.8445	27.4938	21.7457
mock	33.8597	33.0797	28.0979	28.4375	27.732	33.4821	21.3014
	34.0461	33.2785	28.3251	28.2301	27.4307	33.0688	21.2239
	34.2373	33.3253	28.0378	28.4988	27.5915	33.8149	21.1979
B24	31.027	32.1451	27.9053	28.1566	26.339	33.0983	21.2672
	31.6887	32.2022	27.8343	28.5671	26.3169	33.7873	21.4217
	31.5548	32.1954	27.9402	28.0415	26.1686	33.4775	21.3237
B48	31.0155	32.171	28.3406	28.5198	26.5821	34.1117	21.8343
	30.997	31.8176	28.6101	28.1552	26.6688	34.5152	21.9053
	31.126	31.9474	28.5839	28.202	26.8149	34.0968	21.7402
