# Supplementary material for: Identification and characterization of melon circular RNAs involved in powdery mildew responses through comparative transcriptome analysis
Source: PeerJ. 2021 Apr 15;9:e11216. doi: 10.7717/peerj.11216 (PMC8053381; doi:10.7717/peerj.11216)
Supplement: Supplemental Information 5 [file peerj-09-11216-s005.xlsx]

## Sheet: Sheet1
circRNA ID	junction coordinates (5`-3`)
Cmcirc2737	TCGGGTGGTTGGTACATAGTGGGTATATATCACCA
Cmcirc0881	TTTCTGACTTGTGTGAGGTAGGAAAAAGAAACTT
Cmcirc2417	ATGGACTTCGATCTCGTACCAGAGACCTCTTCGC
Cmcirc1695	TTGCCAAAGTATTTGCATTAATGATTGTGATTGCAT
Cmcirc3971	GAAATTTGTTCGTTGAATTCTATGACACTCTCAACA
Cmcirc2732	GTCGATTATCACCTTATATCTGTCATAATATGTACTT
Cmcirc2106	TGTACAAATTGAGGTAGAAGGATTCAAATAATGAAT
Cmcirc1290	AATAGCCTTAGCAGTTCGTGGATCAGTATCTTTAGA
Cmcirc1283	ATAGTGTCCAATGATGATAAGTTGTTTCATTTT
Cmcirc3420	TCTTTAACTGCAAATAGGTGTTCTTCTCACCTCAT
Cmcirc0260	CCGATAGCTGCAGAAGTAGGGATAATAGCACCAG
Cmcirc0834	TTATCAACTCCAGCCATCGTCAACTTTTCAAGTGCT
Cmcirc2076	AGTTTATCAATGTGTGGATGCCTTTCTTTTGGTGCC
Cmcirc2880	TAACGTTTACTGGGCCTGCTATTGGATTGTGGATTT
Cmcirc0927	AAAACGTTTGCACGTCGTCCAAGGAATAGTTCAA
Cmcirc2456	GGATCGGGGAGATTGCTTTTGACACTTACCATCT
Cmcirc2529	TCGAATTGTTCATAGAGATGTTAAAGCTAGTAACA
Cmcirc2859	TCACTTTAATTAAAGTAGCTGTTTGTTTGAAG
Cmcirc3115	ATCAAGAAACTTGTAAGCTATAGCTCCTAGAT
Cmcirc3267	AATATGAGGTTAGTCGTGAGTTGTATAAATACAG
Cmcirc3449	AGGCCAATTTATACAATTGTAGTTAAGTTTGTAAAAG
Cmcirc3992	AAATCAACTTAATATTGTCGATTATCACCTTATATCT
Cmcirc4093	TTTATGAATACAATCATCTACTTATCTAACTTATGTG

## Sheet: Sheet2
circRNA ID	M0	M24	M48	B0	B24	B48
ath_circ_00002419	20995.1	35672.4	41217.2	658.979	3095.02	1288.66		20996.1	35673.4	41218.2	659.979	3096.02	1289.66
ath_circ_00000588	11562.7	14095	31258.6	13308.6	17184.9	25128.7		11563.7	14096	31259.6	13309.6	17185.9	25129.7
ath_circ_00002737	8058.86	20408.2	23236.5	1614.47	74385.1	24825.9		8059.86	20409.2	23237.5	1615.47	74386.1	24826.9
ath_circ_00000881	7358.09	10795.6	10021.3	0	0	0		7359.09	10796.6	10022.3	1	1	1
ath_circ_00002417	5956.55	13611.8	15214.4	928.505	0	1211.02		5957.55	13612.8	15215.4	929.505	1	1212.02
ath_circ_00001695	5606.17	9622.15	10788.4	8666.05	11397.7	10596.4		5607.17	9623.15	10789.4	8667.05	11398.7	10597.4
ath_circ_00003971	3503.85	3796.87	8575.38	3626.77	8098.38	7266.12		3504.85	3797.87	8576.38	3627.77	8099.38	7267.12
ath_circ_00002732	3153.47	10385.8	9958.51	0	0	0		3154.47	10386.8	9959.51	1	1	1
ath_circ_00002106	2803.08	5632.48	6915.63	4843.4	11997.6	14835		2804.08	5633.48	6916.63	4844.4	11998.6	14836
ath_circ_00001290	2452.7	4928.42	3644.09	3714.02	8998.2	3633.06		2453.7	4929.42	3645.09	3715.02	8999.2	3634.06
ath_circ_00001283	2102.31	3709.2	4858.79	3874.72	3299.34	3027.55		2103.31	3710.2	4859.79	3875.72	3300.34	3028.55
ath_circ_00003420	1401.54	4746.08	9405.26	3404.52	11097.8	11201.9		1402.54	4747.08	9406.26	3405.52	11098.8	11202.9
ath_circ_00000260	1469.51	2346.87	3036.74	0	0	0		1470.51	2347.87	3037.74	1	1	1
ath_circ_00000834	469.373	1135.93	1659.75	1614.47	4499.1	908.265		470.373	1136.93	1660.75	1615.47	4500.1	909.265
ath_circ_00002076	7007.77	0	0	7737.54	7798.44	0		7008.77	1	1	7738.54	7799.44	1
ath_circ_00002880	2204.26	3285.61	1383.13	1547.51	3899.22	3633.06		2205.26	3286.61	1384.13	1548.51	3900.22	3634.06
ath_circ_00000927	0	0	0	2166.51	2999.4	2422.04		1	1	1	2167.51	3000.4	2423.04
ath_circ_00002456	2571.64	6407.21	7526.6	2476.01	7498.5	6357.86		2572.64	6408.21	7527.6	2477.01	7499.5	6358.86
ath_circ_00002529	0	0	0	899.82	2260.25	5449.59		1	1	1	900.82	2261.25	5450.59
ath_circ_00002859	0	938.747	4149.38	0	899.82	859.107		1	939.747	4150.38	1	900.82	860.107
ath_circ_00003115	0	4224.36	9343.37	0	0	6357.86		1	4225.36	9344.37	1	1	6358.86
ath_circ_00003267	0	0	9958.51	0	4333.02	3899.22		1	1	9959.51	1	4334.02	3900.22
ath_circ_00003449	0	0	1730.96	2166.51	4499.1	5146.84		1	1	1731.96	2167.51	4500.1	5147.84
ath_circ_00003992	0	1529.33	3520.3	0	0	0		1	1530.33	3521.3	1	1	1
ath_circ_00004093	0	1038.15	2766.25	0	0	0		1	1039.15	2767.25	1	1	1

## Sheet: Sheet3
20996.1	35673.4	41218.2	659.979	3096.02	1289.66		14.3578	15.1226	15.331	9.36628	11.5962	10.3328
11563.7	14096	31259.6	13309.6	17185.9	25129.7		13.4973	13.783	14.932	13.7002	14.0689	14.6171
8059.86	20409.2	23237.5	1615.47	74386.1	24826.9		12.9765	14.3169	14.5042	10.6577	16.1827	14.5996
7359.09	10796.6	10022.3	1	1	1		12.8453	13.3983	13.2909	0	0	0
5957.55	13612.8	15215.4	929.505	1	1212.02		12.5405	13.7327	13.8932	9.86032	0	10.2432
5607.17	9623.15	10789.4	8667.05	11398.7	10597.4		12.4531	13.2323	13.3973	13.0813	13.4766	13.3714
3504.85	3797.87	8576.38	3627.77	8099.38	7267.12		11.7751	11.891	13.0662	11.8249	12.9836	12.8272
3154.47	10386.8	9959.51	1	1	1		11.6232	13.3425	13.2819	0	0	0
2804.08	5633.48	6916.63	4844.4	11998.6	14836		11.4533	12.4598	12.7559	12.2421	13.5506	13.8568
2453.7	4929.42	3645.09	3715.02	8999.2	3634.06		11.2607	12.2672	11.8317	11.8592	13.1356	11.8274
2103.31	3710.2	4859.79	3875.72	3300.34	3028.55		11.0384	11.8573	12.2467	11.9202	11.6884	11.5644
1402.54	4747.08	9406.26	3405.52	11098.8	11202.9		10.4538	12.2128	13.1994	11.7337	13.4381	13.4516
1470.51	2347.87	3037.74	1	1	1		10.5221	11.1971	11.5688	0	0	0
470.373	1136.93	1660.75	1615.47	4500.1	909.265		8.87766	10.1509	10.6976	10.6577	12.1357	9.82856
7008.77	1	1	7738.54	7799.44	1		12.7749	0	0	12.9178	12.9292	0
2205.26	3286.61	1384.13	1548.51	3900.22	3634.06		11.1067	11.6824	10.4348	10.5967	11.9293	11.8274
1	1	1	2167.51	3000.4	2423.04		0	0	0	11.0818	11.5509	11.2426
2572.64	6408.21	7527.6	2477.01	7499.5	6358.86		11.329	12.6457	12.878	11.2744	12.8726	12.6346
1	1	1	900.82	2261.25	5450.59		0	0	0	9.8151	11.1429	12.4122
1	939.747	4150.38	1	900.82	860.107		0	9.87613	12.019	0	9.8151	9.74837
1	4225.36	9344.37	1	1	6358.86		0	12.0449	13.1899	0	0	12.6346
1	1	9959.51	1	4334.02	3900.22		0	0	13.2819	0	12.0815	11.9293
1	1	1731.96	2167.51	4500.1	5147.84		0	0	10.7582	11.0818	12.1357	12.3298
1	1530.33	3521.3	1	1	1		0	10.5796	11.7819	0	0	0
1	1039.15	2767.25	1	1	1		0	10.0212	11.4342	0	0	0
